# Supplementary material for: Development of a fully bio-based hyperbranched benzoxazine
Source: Royal Society of Chemistry journal article supplement (doi:10.1039/d1py01451j), 2021-01-01
Supplement: d1py01451j1.pdf [file d1py01451j1.pdf]

## ***Electronic Supplementary Information***

### **Development of a fully bio-based hyperbranched benzoxazine**

Wanan Cai,<sup>a</sup> Zhicheng Wang,<sup>a</sup> Zhaohui Shu,<sup>a</sup> Wenbin Liu,<sup>\*a</sup> Jun Wang<sup>\*a</sup> and Jian Qiu<sup>\*b</sup>

*<sup>a</sup> Institute of Composite Materials, Key Laboratory of Superlight Material and Surface Technology of Ministry of Education, College of Materials Science and Chemical Engineering, Harbin Engineering University, Harbin 150001, PR China.*

*wjlwb@163.com*

*wj6267@hrbeu.edu.cn*

*<sup>b</sup> State Key Laboratory of Polymer Physics and Chemistry, Changchun Institute of Applied Chemistry, Chinese Academy of Science, Changchun 130022, PR China.*

*qiujian@ciac.ac.cn*

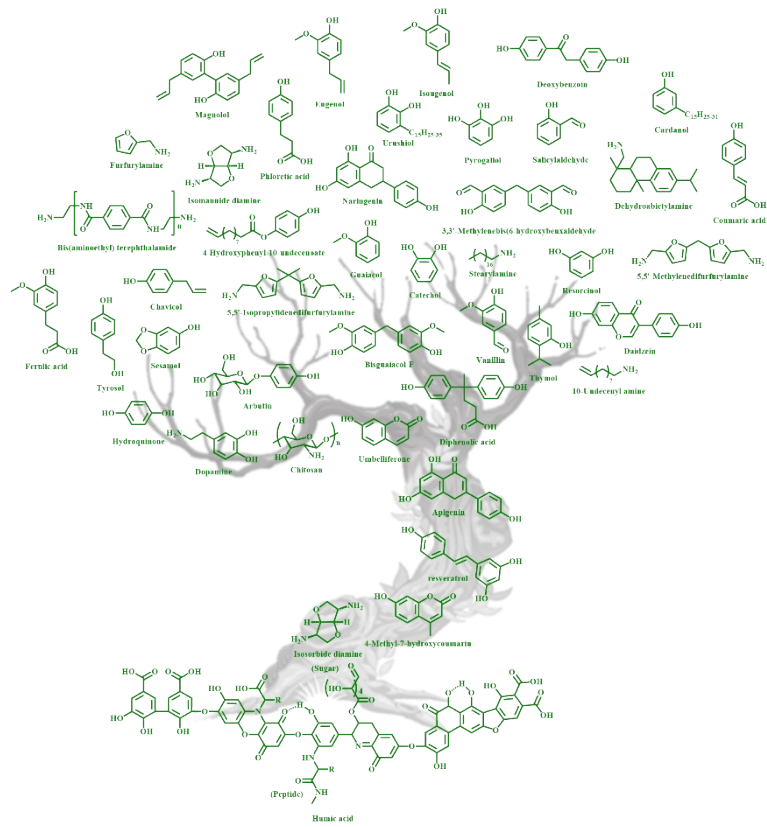

Fig. S1 Chemical structures of renewable feedstocks. 1-36

**Table S1**  $T_5$  and  $T_g$  values of fully bio-based polybenzoxazines

| Sample names   | Original structures | $T_g$ (°C) | $T_5$ (°C) | Ref. |
|----------------|---------------------|------------|------------|------|
| poly(DPA-fa)   |                     | 280        | 344        | 37   |
| poly(T-fa)     |                     | 232        | 349        | 35   |
| poly(NAR-fa)   |                     | 286        | 361        | 18   |
| poly(API-fa)-1 |                     | 295        | 301        | 38   |
| poly(API-fa)-2 |                     | 376        | 384        | 38   |
| poly(RES-fa)   |                     | 312        | 346        | 39   |
| poly(AP-f)     |                     | 182        | 296        | 17   |
| poly(M-fa)     |                     | 303        | 440        | 21   |

|                |                                                                                     |     |     |    |
|----------------|-------------------------------------------------------------------------------------|-----|-----|----|
| poly(E-fa)     | 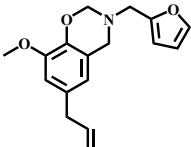   | 183 | 338 | 25 |
| poly(IE-fa)    |    | 179 | 375 | 25 |
| poly(S-Bz)     |    | 101 | 313 | 40 |
| poly(IE-dea)   |    | 138 | 340 | 41 |
| poly(G-dea)    |   | 216 | 347 | 41 |
| poly(A-Fa)     |  | 190 | 270 | 32 |
| poly(DFA-fa)   |  | 310 | 382 | 42 |
| poly(DaSa-BOX) |  | 104 | 278 | 43 |
| BGF-SPBz       |  | 124 | 349 | 36 |
| poly(Bzf)      |  | 148 | 352 | 2  |

|           |  |     |     |    |
|-----------|--|-----|-----|----|
| poly(Bzs) |  | 82  | 329 | 2  |
| P(R-Fa)   |  | 300 | 335 | 30 |
| P(H-Fa)   |  | 280 | 310 | 30 |
| PBz_TPo   |  | 58  | 284 | 12 |
| PBz_TPf   |  | 145 | 335 | 12 |

**Table S2** CTE and  $T_g$  values of thermosets

| Sample names   | Original structures                                                                 | CTE (ppm/°C) | $T_g$ (°C) | Ref. |
|----------------|-------------------------------------------------------------------------------------|--------------|------------|------|
| poly(DBA-ac)   | 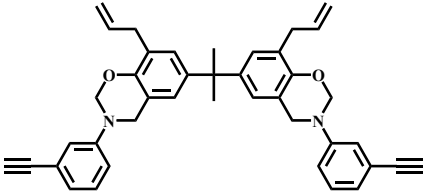   | 41.3         | 333        | 44   |
| poly(API-fa)-1 |    | 60.9         | 295        | 38   |
| poly(API-fa)-2 |   | 41.2         | 376        | 38   |
| PDF            |    | 46.6         | 303        | 45   |
| PDA            |   | 50.9         | 220        | 45   |
| PBA            |  | 54.2         | 167        | 45   |
| poly(BHDB-a)   |  | 48.4         | 311        | 19   |
| poly(RES-fa)   |  | 36.2         | 312        | 39   |
| poly(RES-a)    |  | 40.4         | 311        | 20   |

|                |                                                                                     |      |     |    |
|----------------|-------------------------------------------------------------------------------------|------|-----|----|
| poly(RES-ac)   | 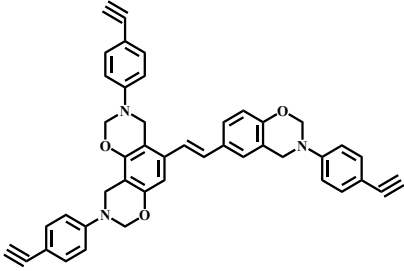   | 29.4 | 368 | 20 |
| poly(RES-ch)   |    | 45.0 | 277 | 20 |
| P(DGEBA)       |    | 76.2 | 165 | 46 |
| P(P-tta)       |   | 32.0 | 265 | 47 |
| P(BACY)        |  | 60.0 | 266 | 48 |
| P(P-ddm)       |  | 59.0 | 183 | 48 |
| P(HPPE-a)      |  | 43.0 | 200 | 49 |
| poly(oHPNI-ac) |  | 19.6 | 280 | 50 |
| poly(V-BF-a)   |  | 60.6 | 220 | 51 |
| P-ABz          |  | 56   | 161 | 52 |

|         |                                                                                   |       |     |    |
|---------|-----------------------------------------------------------------------------------|-------|-----|----|
| P-FBz   | 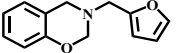 | 45    | 315 | 52 |
| BPA-FBz |  | 37    | 308 | 52 |
| P-AH    |  | 90.6  | 226 | 53 |
| P-TH    |  | 92.9  | 146 | 53 |
| P-TAH   |  | 64.6  | 195 | 53 |
| P-AM    |  | 111.0 | 245 | 53 |



## References

- 1 I. Machado, I. Hsieh, E. Rachita, M. L. Salum, D. Iguchi, N. Pogharian, A. Pellet, P. Froimowicz, V. Calado and H. Ishida, *Green Chem.*, 2021, **23**, 4051-4064.
- 2 C. F. Wang, J. Q. Sun, X. D. Liu, A. Sudo and T. Endo, *Green Chem.*, 2012, **14**, 2799-2806.
- 3 A. Tuzun, G. Lligadas, J. C. Ronda, M. Galia and V. Cadiz, *Eur. Polym. J.*, 2015, **67**, 503-512.
- 4 C. J. Higginson, K. G. Malollari, Y. Xu, A. V. Kelleghan, N. G. Ricapito and P. B. Messersmith, *Angew. Chem. Int. Ed.*, 2019, **131**, 12399-12407.
- 5 X. Y. Liu, Z. Y. Li, G. Z. Zhan, Y. T. Wu and Q. X. Zhuang, *J. Appl. Polym. Sci.*, 2019, **136**, 48255.
- 6 X. B. Shen, J. Y. Dai, Y. Liu, X. Q. Liu and J. Zhu, *Polymer*, 2017, **122**, 258-269.
- 7 J. Q. Zhao, Y. Liu, S. M. Zhang, J. J. Qiu and C. M. Liu, *React. Funct. Polym.*, 2020, **149**, 104516.
- 8 N. Amarnath, S. Shukla and B. Lochab, *ACS Sustain. Chem. Eng.*, 2019, **7**, 18700-18710.
- 9 N. Amarnath, S. Mukherjee and B. Lochab, *ACS Sustain. Chem. Eng.*, 2021, **9**, 7550-7560.
- 10 P. Sharma, B. Lochab, D. Kumar and P. K. Roy, *ACS Sustain. Chem. Eng.*, 2016, **4**, 1085-1093.
- 11 A. A. Alhwaige, T. Agag, H. Ishida and S. Qutubuddin, *Biomacromolecules*, 2013, **14**, 1806-1815.
- 12 L. Zhang, Y. J. Zhu, D. Li, M. Wang, H. B. Chen and J. S. Wu, *RSC Adv.*, 2015, **5**, 96879-96887.
- 13 Z. Qian, Y. Zheng, Q. Li, L. Wang, F. Fu and X. Liu, *ACS Sustain. Chem. Eng.*, 2021, **9**, 4668-4680.
- 14 T. Y. Inan, B. Y. Karaca and H. Dogan, *J. Appl. Polym. Sci.*, 2013, **128**, 2046-2055.
- 15 M. Comi, G. Lligadas, J. C. Ronda, M. Galia and V. Cadiz, *J. Polym. Sci. Polym. Chem.*, 2013, **51**, 4894-4903.
- 16 J. Dai, N. Teng, Y. Peng, Y. Liu, L. Cao, J. Zhu and X. Liu, *ChemSusChem*, 2018,

- 11**, 3175-3183.
- 17 P. Thirukumaran, R. K. Manoharan, A. S. Parveen, R. Atchudan and S. C. Kim, *Polymer*, 2019, **172**, 100-109.
- 18 K. Zhang, Y. Q. Liu, M. C. Han and P. Froimowicz, *Green Chem.*, 2020, **22**, 1209-1219.
- 19 K. Zhang, X. Tan, Y. Wang and H. Ishida, *Polymer*, 2019, **168**, 8-15.
- 20 K. Zhang, M. C. Han, L. Han and H. Ishida, *Eur. Polym. J.*, 2019, **116**, 526-533.
- 21 N. Teng, S. M. Yang, J. Y. Dai, S. P. Wang, J. Zhao, J. Zhu and X. Q. Liu, *ACS Sustain. Chem. Eng.*, 2019, **7**, 8715-8723.
- 22 L. R. V. Kotzebue, J. R. de Oliveira, J. B. da Silva, S. E. Mazzetto, H. Ishida and D. Lomonaco, *ACS Sustain. Chem. Eng.*, 2018, **6**, 5485-5494.
- 23 P. Sharma, D. Kumar and P. K. Roy, *Polymer*, 2018, **138**, 343-351.
- 24 H. L. Xu, Z. J. Lu and G. Z. Zhang, *RSC Adv.*, 2012, **2**, 2768-2772.
- 25 N. Amarnath, S. Shukla and B. Lochab, *ACS Sustain. Chem. Eng.*, 2018, **6**, 15151-15161.
- 26 P. Froimowicz, R. A. C. L. Han and H. Ishida, *ChemSusChem*, 2016, **9**, 1921-1928.
- 27 B. Kiskan and Y. Yagci, *J. Polym. Sci. Polym. Chem.*, 2007, **45**, 1670-1676.
- 28 C. Chen, Y. Z. Cao, X. Lu, X. Li, H. J. Yao and Z. Xin, *Colloids Surf. Physicochem. Eng. Aspects*, 2021, **609**, 125605.
- 29 A. Arnebold, O. Schorsch, J. Stelten and A. Hartwig, *J. Polym. Sci. Polym. Chem.*, 2014, **52**, 1693-1699.
- 30 L. Dumas, L. Bonnaud, M. Olivier, M. Poorteman and P. Dubois, *Eur. Polym. J.*, 2016, **75**, 486-494.
- 31 Y. E. Dogan, B. Satilmis and T. Uyar, *J. Appl. Polym. Sci.*, 2019, **136**, 47371.
- 32 L. Dumas, L. Bonnaud, M. Olivier, M. Poorteman and P. Dubois, *Green Chem.*, 2016, **18**, 4954-4960.
- 33 M. L. Salum, D. Iguchi, C. R. Arza, L. Han, H. Ishida and P. Froimowicz, *ACS Sustain. Chem. Eng.*, 2018, **6**, 13096-13106.
- 34 L. Dumas, L. Bonnaud, M. Olivier, M. Poorteman and P. Dubois, *Eur. Polym. J.*, 2016, **81**, 337-346.

- 35 Z. Wen, L. Bonnaud, R. Mincheva, P. Dubois and J. M. Raquez, *Materials (Basel)*, 2021, **14**.
- 36 T. Periyasamy, S. P. Asrafali, S. Muthusamy and S. C. Kim, *New J. Chem.*, 2016, **40**, 9313-9319.
- 37 Z. Z. Qian, Y. L. Zheng, Q. Li, L. J. Wang, F. Y. Fu and X. D. Liu, *ACS Sustain. Chem. Eng.*, 2021, **9**, 4668-4680.
- 38 B. R. Hao, L. Han, Y. Q. Liu and K. Zhang, *Polym. Chem.*, 2020, **11**, 5800-5809.
- 39 K. Zhang, M. C. Han, Y. Q. Liu and P. Froimowicz, *ACS Sustain. Chem. Eng.*, 2019, **7**, 9399-9407.
- 40 P. Thirukumaran, A. S. Parveen and M. Sarojadevi, *ACS Sustain. Chem. Eng.*, 2014, **2**, 2790-2801.
- 41 X. L. Sha, L. Yuan, G. Z. Liang and A. J. Gu, *ACS Sustain. Chem. Eng.*, 2020, **8**, 18696-18705.
- 42 Z. Z. Qian, Q. Li, L. J. Wang, F. Y. Fu and X. D. Liu, *J. Polym. Sci.*, 2021, **59**, 2057-2068.
- 43 A. Rucigaj, R. Ambrozic and M. Krajnc, *Macromol. Mater. Eng.*, 2020, **305**, 2000463.
- 44 R. Yang and K. Zhang, *React. Funct. Polym.*, 2021, **165**.
- 45 Z. J. Feng, M. Zeng, D. W. Meng, J. B. Chen, W. L. Zhu, Q. Y. Xu and J. X. Wang, *J. Mater. Sci-Mater. El.*, 2020, **31**, 4364-4376.
- 46 C. K. Chozhan, A. Chandramohan and M. Alagar, *J. Macromol. Sci. A*, 2019, **56**, 1-16.
- 47 C. H. Lin, Y. C. Chou, M. W. Wang and R. J. Jeng, *RSC Adv.*, 2016, **6**, 17539-17545.
- 48 C. H. Lin, S. J. Huang, P. J. Wang, H. T. Lin and S. A. Dai, *Macromolecules*, 2012, **45**, 7461-7466.
- 49 C. C. Huang, C. H. Lin and S. A. Dai, *RSC Adv.*, 2015, **5**, 74874-74880.
- 50 K. Zhang and X. Yu, *Macromolecules*, 2018, **51**, 6524-6533.
- 51 K. K. Ho, M. C. Hsiao, T. Y. Chou, C. C. M. Ma, X. F. Xie, J. C. Chiang, S. H. Yang and L. H. Chang, *Polym. Int.*, 2013, **62**, 966-973.

- 52 Y. L. Liu and C. I. Chou, *J. Polym. Sci. Polym. Chem.*, 2005, **43**, 5267-5282.
- 53 C. Jiangbing, Z. Ming, F. Zijian, P. Tao, H. Yiwan and X. Qingyu, *ACS Appl. Polym. Mater.*, 2019, **1**, 625-630.
